# Supplementary material
Source: PubMed Central journal article supplement (PMC3657096)
Supplement: supp_113.051623_supplemental_figures.pdf [file supp_113.051623_supplemental_figures.pdf]

# p38 mitogen activated protein kinase regulates the nuclear receptor CAR to activate the *CYP2B6* gene

Kosuke Saito, Rick Moore, and Masahiko Negishi

Drug Metabolism and Disposition

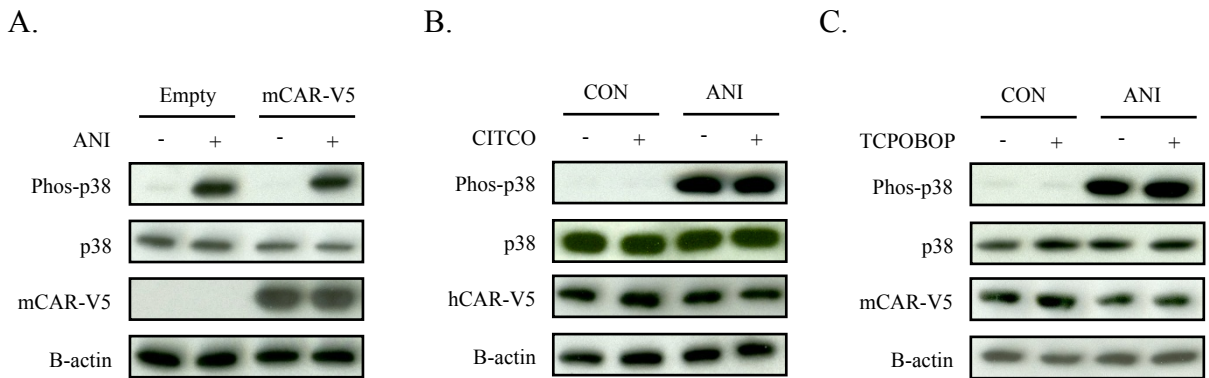

**Supplemental Figure 1.** Activation of p38 MAPK by anisomycin in HepG2 transiently expressing mouse CAR (A), Yh18 (B) and Ym17 cells (C).

A-C. Cell extracts were prepared as described in Materials & Methods from HepG2 transiently expressing mouse CAR (A), Yh18 (B) and Ym17 cells (C) at 2 hr of anisomycin with CITCO/TCPOBOP treatment. Protein levels of phosphorylated p38 MAPK (Phos-p38), p38 MAPK (p38) and V5-tagged mouse and human CAR (mCAR-V5 and hCAR-V5, respectively). Protein levels of B-actin were determined as internal control. Data shown are representative of results from two to three individual experiments.

# p38 mitogen activated protein kinase regulates the nuclear receptor CAR to activate the *CYP2B6* gene

Kosuke Saito, Rick Moore, and Masahiko Negishi

## Drug Metabolism and Disposition

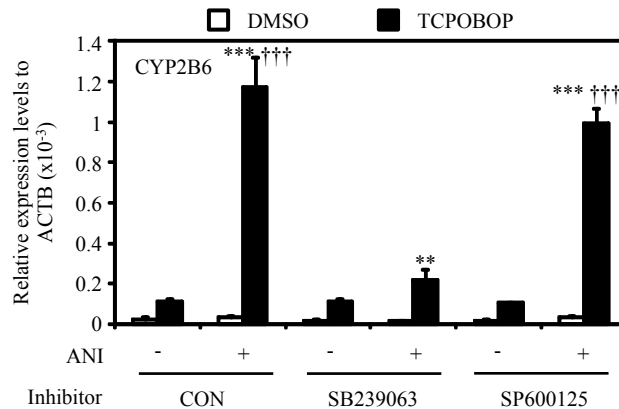

### Supplemental Figure 2. Effect of p38 MAPK inhibitor SB239063 on the anisomycin potentiated *CYP2B6* induction by CAR in Ym17 cells.

Total RNAs were prepared as described in Materials & Methods from Ym17 cells treated as described Materials and Methods. SB239063 and a JNK inhibitor SP600125 were pre-treated 1 hr before anisomycin and/or TCPOBOP treatment. Expression level of *CYP2B6* mRNA was determined. Values are expressed as the relative expression levels normalized to the expression levels of B-actin (ACTB) mRNA. Data are mean  $\pm$  S.D. (n = 3 or 4 in each group). \* p < 0.05, \*\* p < 0.01, \*\*\* p < 0.005 for comparison between with and without TCPOBOP exposure, ††† p < 0.005 for comparison between with and without anisomycin exposure. Newman-Keuls multiple comparison test. CON, control; ANI, anisomycin.
